1  
2  
3  
4  
5  
6  
7  
8  
9  
10  
11  
12  
13  
14  
15  
16  
17  
18  
19  
20  
21

**Targeted stimulation of an orbitofrontal network disrupts decisions based on inferred, not experienced outcomes**

Fang Wang<sup>1</sup>, James D. Howard<sup>1</sup>, Joel L. Voss<sup>1,2,3</sup>, Geoffrey Schoenbaum<sup>4</sup>, Thorsten Kahnt<sup>1,3,5,\*</sup>

<sup>1</sup>*Department of Neurology, Feinberg School of Medicine, Northwestern University, Chicago, IL 60611, USA.*

<sup>2</sup>*Department of Medical Social Sciences, Feinberg School of Medicine, Northwestern University, Chicago, IL 60611, USA.*

<sup>3</sup>*Department of Psychiatry and Behavioral Sciences, Feinberg School of Medicine, Northwestern University, Chicago, Illinois, USA.*

<sup>4</sup>*National Institutes on Drug Abuse, Intramural Research Program, Baltimore, MD 21224, USA.*

<sup>5</sup>*Department of Psychology, Weinberg College of Arts and Sciences, Northwestern University, Evanston, IL 60208, USA.*

\*Correspondence should be addressed to [thorsten.kahnt@northwestern.edu](mailto:thorsten.kahnt@northwestern.edu)

**Keywords:** Orbitofrontal cortex, reward, inference, decision-making, transcranial magnetic stimulation, human, sensory preconditioning, model-based, model-free.

22 **ABSTRACT**

23 When direct experience is unavailable, animals and humans can imagine or infer the future to  
24 guide decisions. Behavior based on direct experience versus inference may recruit distinct but  
25 overlapping brain circuits. In rodents, the orbitofrontal cortex (OFC) contains neural signatures of  
26 inferred outcomes, and OFC is necessary for behavior that requires inference but not for  
27 responding driven by direct experience. In humans, OFC activity is also correlated with inferred  
28 outcomes, but it is unclear whether OFC activity is required for inference-based behavior. To test  
29 this, we used non-invasive network-based continuous theta burst stimulation (cTBS) to target  
30 lateral OFC networks in the context of a sensory preconditioning task that was designed to isolate  
31 inference-based behavior from responding that can be based on direct experience alone. We  
32 show that relative to sham, cTBS targeting this network impairs reward-related behavior in  
33 conditions in which outcome expectations have to be mentally inferred. In contrast, OFC-targeted  
34 stimulation does not impair behavior that can be based on previously experienced stimulus-  
35 outcome associations. These findings suggest that activity in the targeted OFC network supports  
36 decision making when outcomes have to be mentally simulated, providing converging cross-  
37 species evidence for a critical role of OFC in model-based but not model-free control of behavior.

38

## 39 INTRODUCTION

40 Many decisions are made based on expectations about their likely outcomes. Such expectations  
41 can reflect what we have experienced in the past, for instance, when ordering your favorite dish  
42 at a familiar restaurant. For many other decisions in life, such as deciding to try out a new  
43 restaurant or enrolling in a PhD program, direct experience is lacking, and outcome expectations  
44 need to be mentally simulated or inferred.

45 Expectations arising from these two different origins, which may compete for control over behavior  
46 (Daw et al., 2005; Lee et al., 2014), are thought to recruit distinct but overlapping brain circuits  
47 (Balleine and Dickinson, 1998; Daw et al., 2011; O'Doherty et al., 2017). Whereas much research  
48 has focused on behavior that is based on direct experience (Schultz, 1998; Tricomi et al., 2009;  
49 Wunderlich et al., 2012), less is known about the neural representations that support behavior  
50 based on inferred outcomes in humans.

51 Work across animal species suggests that the orbitofrontal cortex (OFC), together with the  
52 hippocampus, is particularly important for behavior based on inference (Rudebeck and Murray,  
53 2014; Wikenheiser and Schoenbaum, 2016). For instance, in tasks that require mental simulation,  
54 neural activity in the rodent OFC represents inferred outcomes in almost the same way as it  
55 signals directly experienced outcomes (Takahashi et al., 2013; Sadacca et al., 2018).  
56 Interestingly, however, the rat OFC is not required for behavior based on directly experienced  
57 outcomes, but it is only necessary when responding requires inference (Jones et al., 2012;  
58 Takahashi et al., 2013). This suggests that rodent OFC is selectively required for the simulation  
59 of outcomes. Recent work in humans has shown similar neural correlates of inferred outcomes in  
60 the OFC (Barron et al., 2013; Wang et al., 2020), but whether human OFC networks are required  
61 for behavior based on such inferred outcomes is unclear.

62 Causal studies on human OFC function have traditionally been limited to naturally-occurring  
63 lesions (Reber et al., 2017; Vaidya et al., 2019). However, we have recently developed a novel  
64 network-based transcranial magnetic stimulation (TMS) approach to non-invasively target activity  
65 in human OFC networks (Howard et al., 2020). Similar to previous work targeting the hippocampal  
66 network (Wang et al., 2014), this approach uses resting-state functional magnetic resonance  
67 imaging (rsfMRI) to individually define stimulation coordinates in the lateral prefrontal cortex  
68 (LPFC) that are part of the central/lateral OFC network (Kahnt et al., 2012; Zald et al., 2014). We  
69 have recently shown that this targeted TMS protocol selectively affects connectivity in lateral OFC  
70 networks, in parallel with disrupting OFC-dependent behavior (Howard et al., 2020).

71 In the current study (**Fig. 1A**), we applied this novel OFC-targeted brain stimulation approach in  
72 the context of a sensory preconditioning task that was designed to isolate inference-based  
73 behavior from responding that can be based on direct experience (Jones et al., 2012; Wimmer  
74 and Shohamy, 2012; Wang et al., 2020). This task consists of three phases (**Fig. 1B**): First, during  
75 preconditioning, pairs of sensory cues are repeatedly presented ( $A \rightarrow B$ ,  $C \rightarrow D$ ). Next, during  
76 conditioning, the second cue of each pair is associated with reward and no reward, respectively  
77 ( $B \rightarrow \text{reward}$ ,  $D \rightarrow \text{no reward}$ ). During the final probe test, reward-related responding to each cue  
78 (A, B, C, and D) is probed under extinction conditions. Reward-related responses to cue A indicate  
79 that subjects step through the associations  $A \rightarrow B$  and  $B \rightarrow \text{reward}$  to infer  $A \rightarrow \text{reward}$ . In contrast,  
80 such responses to cue B do not require inference because direct experience with the cue-  
81 outcome pairing is available. We predicted that disrupting OFC network activity with OFC-targeted  
82 TMS will impair inference-based behavior (responding to cue A), but not behaviors that can be  
83 based entirely on direct experience alone (responding to cue B).

84

85

## 86 **MATERIALS AND METHODS**

### 87 ***Subjects***

88 In total, 71 healthy adults participated in a screening session. Of these, 52 passed screening,  
89 were randomly assigned to the sham (SHAM:  $n=25$ , 13 female) or stimulation group (STIM:  $n=27$ ,  
90 15 female), and participated in the experiment. All participants provided written informed consent  
91 to participate and were compensated with \$20 per hour for behavioral testing and \$40 per hour  
92 for TMS and MRI scanning. The study protocol was approved by the Northwestern University  
93 Institutional Review Board. One participant in the STIM group withdrew during the experiment.  
94 Data from four participants (two per group) were excluded from all analyses because their  
95 performance in the last run of conditioning was not significantly above chance ( $p > 0.05$ , binomial  
96 test). This left a total of 47 participants (SHAM:  $n=23$ , 12 female, mean age = 25.24 years  $\pm$  0.86  
97 s.e.m; STIM:  $n=24$ , 13 female, age = 25.30 years  $\pm$  0.70) from whom data was analyzed. Of those,  
98 data from four participants (one SHAM, three STIM) from the recognition memory test of the  
99 experiment were not recorded due to technical problems.

100

### 101 ***Stimuli and Odor Delivery***

102 Visual cues consisted of 14 abstract symbols, and 12 of them were randomly grouped into six  
103 pairs for each participant. Two pairs served as A1–B1 pairs, two served as A2–B2 pairs, and two  
104 served as C–D pairs. The two remaining symbols were used to form two catch-trial pairs (E–E) in  
105 which the same symbols were presented twice in a row (i.e., E1–E1, E2–E2). The two symbols  
106 constituting a pair were presented in different colors (e.g., first symbol blue, second symbol green;  
107 counterbalanced across participants).

108 As in our previous studies, the current experiment used food odors as biologically relevant reward  
109 in hungry participants (Howard et al., 2015; Howard and Kahnt, 2017, 2018; Suarez et al., 2019;  
110 Howard et al., 2020). Eight food odors (four sweet: strawberry, caramel, gingerbread, and yellow  
111 cake; four savory: potato chip, pot roast, garlic, and pizza) were provided by Kerry (Melrose Park,  
112 IL) and International Flavors and Fragrances (New York, NY). Odors were delivered to  
113 participants' nose using a custom-built and computer-controlled olfactometer (Howard et al., 2020;  
114 Wang et al., 2020). The olfactometer was equipped with two independent mass flow controllers  
115 (Alicat, Tucson, AZ), which allow dilution of any given odorant with odorless air. Odorless air was  
116 delivered constantly during the experiment and odorized air was mixed into the airstream at  
117 specific time points. The overall flow rate was kept constant at 3.2 L/min throughout the task, such  
118 that odor deliver did not involve a change in overall airflow or any noticeable change in  
119 somatosensory stimulation.

120

## 121 ***Experimental Task and Design***

122 The study was conducted over three days (**Fig. 1A**) and included (1) a screening session, (2) a  
123 MRI and TMS motor threshold session, and (3) a main task session. The MRI and TMS motor  
124 threshold session was conducted on average 18 days (s.e.m.=4.16) after the screening session.  
125 And the average delay between motor threshold and main task sessions was 4 days (s.e.m.=0.94).  
126 Participants were instructed to arrive in a hungry state (fast for at least 4 hours) for the screening  
127 and main task sessions.

128

129 *Screening Session.* After informed consent and screening for eligibility, participants' rated the  
130 pleasantness of eight food odors. In each trial, participants were presented with one of the eight  
131 food odors for 2 seconds and were instructed to make a medium sized sniff. They then rated the  
132 pleasantness of the delivered odor on a scale from "Most disliked sensation" to "Most liked

133 sensation". Each food odor was presented 3 times in randomized order and ratings were  
134 averaged. We then selected one sweet and one savory odor that were both rated as pleasant (i.e.  
135 pleasantness above neutral) and as closely matched as possible. The two selected odors were  
136 then used as reward for that individual participant in the main task session. If no such two odors  
137 were found, participants were excluded from further participation in the study. Next, participants  
138 rated the intensity and pleasantness of the two selected odors as well as odorless air. The scale  
139 of the intensity rating was from "Undetectable" to "Strongest sensation imaginable".

140

141 *MRI and TMS Motor Threshold Session.* We acquired a T1-weighted structural MRI scan for the  
142 purpose of TMS neuronavigation and an 8.5 minutes rsfMRI scan for individually defining OFC-  
143 targeted stimulation coordinates (see below). We then measured resting motor threshold (RMT)  
144 by delivering single TMS pulses over left motor cortex. RMT was defined as the minimum  
145 percentage of stimulator output necessary to evoke 5 visible thumb movements in 10 stimulations.

146

147 *Main Task Session.* The main task session consisted of preconditioning, conditioning, TMS, probe  
148 test, and a cue-cue recognition memory test (**Fig. 1B**). In four preconditioning runs, participants  
149 were instructed to learn the associations between the two cues in each pair (A→B [A1→B1,  
150 A2→B2], C→D [C1→D1, C2→D2], E→E [E1→E1, E2→E2]). The cues in a given pair were  
151 presented one after another for 3 seconds each, separated by an inter-stimulus-interval (ISI) of  
152 300 ms. A fixation cross appeared between trials for a variable inter-trial-interval (ITI) between 3  
153 and 11 seconds. To ensure attention to the cue pairs, participants were instructed to memorize  
154 the cue pairs, press a button if the second cue was different from the first cue, and withhold a  
155 response if the two cues were identical. To facilitate learning, in the first two runs of  
156 preconditioning, each cue pair was repeated three times in a row. In the remaining preconditioning  
157 runs, the order of cue pairs was randomized across trials.

158 Next, participants performed three runs of conditioning, during which the second cue of each pair  
159 (cues B [B1, B2] and D [D1, D2]) was presented individually for 3 seconds. Participants were  
160 instructed to indicate by button press which outcome (e.g. strawberry odor [SB], garlic odor [GA],  
161 or no odor [NO]) they expected following the cue. If they expected strawberry, they were asked  
162 to select "SB"; if they expected garlic, they were asked to select "GA"; if they expected no odor,  
163 they were asked to select "NO". Participants made their prediction by pressing a button with the  
164 index, middle or ring fingers of their right hand corresponding to the positions of "SB", "GA" and

165 “NO” on the screen. The positions of the abbreviated names were randomized across trials.  
166 Irrespective of their selection, the outcome was presented for 2 seconds immediately after the  
167 cue. However, “too slow” was displayed if participants failed to respond within 3 seconds. Each  
168 cue-outcome association was repeated four times in each run in pseudorandomized order.

169 After the conditioning phase, participants received OFC-targeted cTBS (see below). The probe  
170 test followed immediately after the stimulation. In each trial of the probe test, cue A (A1, A2), B  
171 (B1, B2), C (C1, C2), or D (D1, D2) was presented individually under extinction conditions  
172 (odorless air was delivered throughout) to prevent further learning. Each cue was presented four  
173 times in pseudorandomized order. Participants were instructed to predict the outcome after each  
174 cue, as they did during the conditioning phase. They were further instructed to use the cue-cue  
175 associations learned in the first phase to infer the outcomes associated with the preconditioned  
176 cues (Wang et al., 2020). The durations of cue presentation and the ITI were the same as during  
177 the conditioning phase.

178 Following the probe test, participants were tested for their memory of the cue-cue associations in  
179 a recognition task. On each trial, participants were presented with either an original cue pair or  
180 with a newly recombined pair (i.e., consisting of cues belonging to different pairs). Pairs were  
181 presented sequentially as during preconditioning, and participants were asked to indicate using a  
182 button press whether a pair was old (O) or recombined (R) after the second cue was presented.

183

#### 184 ***MRI Data Acquisition***

185 MRI data were acquired at the Northwestern University Center for Translational Imaging (CTI)  
186 using a Siemens 3T PRISMA system equipped with a 64-channel head coil. rsfMRI scans were  
187 acquired with an echoplanar imaging (EPI) sequence with the following parameters: repetition  
188 time (TR), 2 s; echo time (TE), 22 ms; flip angle, 90°; slice thickness, 2 mm, no gap; number of  
189 slices, 58; interleaved slice acquisition order; matrix size, 104 x 96 voxels; field of view, 208 mm  
190 x 192 mm; multiband factor, 2. To minimize susceptibility artifacts in the OFC, the acquisition  
191 plane was tilted approximately 25° from the anterior commissure (AC)–posterior commissure (PC)  
192 line. The rsfMRI scan consisted of 250 EPI volumes covering all but the most dorsal portion of  
193 the parietal lobes. In addition, a 3D 1 mm isotropic T1-weighted structural scan was also collected  
194 (TR, 2300 ms; TE, 2.94 ms; flip angle, 9°; field of view, 176 mm x 256 mm x 256 mm)

195

## 196 ***fMRI Data Preprocessing***

197 Preprocessing of functional images was performed using Statistical Parametric Mapping (SPM12,  
198 <https://www.fil.ion.ucl.ac.uk/spm/>). To correct for head motion during scanning, all rsfMRI images  
199 were aligned to the first acquired image. The mean realigned images were then co-registered to  
200 the anatomical image, and the resulting registration parameters were applied to all realigned EPI  
201 images. Finally, co-registered EPI images were resliced and smoothed with a 6 x 6 x 6 mm  
202 Gaussian kernel. To generate forward and inverse deformation fields, the anatomical image was  
203 normalized to Montreal Neurological Institute (MNI) space using the 6-tissue probability map  
204 provided by SPM12.

205

## 206 ***OFC-targeted Transcranial Magnetic Stimulation***

207 We used our previously established network-based OFC-targeted TMS protocol (Howard et al.,  
208 2020). TMS was delivered using a MagPro X100 stimulator connected to a MagPro Cool-B65  
209 butterfly coil (MagVenture A/S, Farum, Denmark). We used a cTBS protocol involving a 40 second  
210 train of 3-pulse 50 Hz bursts delivered every 200 ms (5 Hz), totaling 600 pulses (Huang et al.,  
211 2005). This TMS protocol has inhibitory aftereffects that last for 50-60 minutes over motor cortex  
212 (Huang et al., 2005). Stimulation was delivered at an intensity of 80% MT in the STIM group and  
213 5% MT in the SHAM group. As in our previous study (Howard et al., 2020), the target coordinate  
214 was defined as a location in the right LPFC that showed maximal functional connectivity with the  
215 right OFC seed coordinate (see details below). The orientation of the coil was such that the long  
216 axis of the figure-of-eight coil was approximately parallel to the long axis of the middle frontal  
217 gyrus. All participants were informed that they may experience muscle twitches in the forehead,  
218 eye area, and jaw during stimulation. We delivered two single test pulses to test for tolerability  
219 before cTBS was delivered. Immediately after the last pulse of cTBS, the time was noted. All  
220 subsequent testing (probe test and recognition memory) took place within  $33 \pm 1.92$  minutes of  
221 the end of TMS, and this time did not differ between groups ( $t=0.24$ ,  $p=0.814$ ).

222

## 223 ***Coordinate selection for OFC-targeted TMS***

224 Stimulation coordinates on the right LPFC were determined for each individual participant based  
225 on rsfMRI connectivity with a right central-lateral OFC seed region using a previously described  
226 procedure (Howard et al., 2020). Briefly, we first created two spherical masks of 8-mm radius



227 around a LPFC coordinate (x=48, y=38, z=20) and a OFC seed coordinate (x=28, y=38, z=-16)  
228 in MNI space, both inclusively masked by the gray matter tissue probability map provided by  
229 SPM12 (thresholded at >0.1). These masks were then inverse-normalized to each participant's  
230 native space using the inverse deformation field generated by normalizing the anatomical image.  
231 We then estimated a general linear model with the average rsfMRI time series in the OFC mask  
232 as the regressor of interest and realignment parameters as regressors of no interest. The voxel  
233 in the LPFC mask that had highest functional connectivity with the OFC seed was defined as  
234 stimulation coordinate. We used neuronavigation to apply stimulation to this coordinate.

235

### 236 **Statistics**

237 Simple between-group effects were tested using unpaired t-tests. Results from parametric tests  
238 were confirmed using permutation tests involving 10,000 random group assignments. Interactions  
239 were tested using R (R Core Team, 2018) and the lme4 package (Bates, 2010). Specifically, we  
240 performed linear mixed effect analysis on odor pleasantness ratings with group (SHAM vs. STIM)  
241 and odor (odor vs. odorless) as independent variables. In addition, to test the interaction between  
242 group, cue type, and time on reward predictions during conditioning, we used a generalized linear  
243 mixed model with group (SHAM vs. STIM), cue (B vs. D), and time (three runs) as independent  
244 variables. Finally, the interaction between group and cue type on reward predictions during the  
245 probe test was tested using a generalized linear mixed model with group (SHAM vs. STIM) and  
246 cue type (A vs. B) as independent variables. In all analyses, subjects were modeled as random  
247 intercept effects. There were no obvious deviations from normality or homoscedasticity based on  
248 visual inspection of residual plots. We computed p values by likelihood ratio tests ( $\chi^2$ ) of the full  
249 model including the effect of interest against the reduced model without the effect of interest.  
250 Statistical thresholds were set to  $p < 0.05$ , two-tailed unless indicated otherwise.

251

252

## 253 **RESULTS**

### 254 ***Odor Ratings and Learning Performance***

255 The experiment took place across three days (**Fig. 1A**). Day 1 and 2 consisted of a screening  
256 visit and a MRI (anatomical and rsfMRI) session, respectively. Day 3 involved a sensory  
257 preconditioning task and network-based OFC-targeted TMS. On day 3, subjects (SHAM, n=23;

258 STIM, n=24) in both groups arrived fasted (not eaten for  $11 \pm 4.27$  hours; group difference,  
259  $t(45)=1.00$ ,  $p=0.321$ ) and with similar levels of hunger ( $t(45)=1.28$ ,  $p=0.205$ ). Subjects first learned  
260 associations between pairs of abstract visual cues during preconditioning ( $A \rightarrow B$ ,  $C \rightarrow D$ , **Fig. 1B**).  
261 Next, they learned that a pleasant food odor followed cue B, whereas cue D was always followed  
262 by odorless air (**Fig. 1B**). To measure reward expectations, participants were asked to predict the  
263 outcome associated with the presented cue via button press.

264 Subjects in both groups rated the food odors as significantly more pleasant than the odorless air  
265 (SHAM:  $t(22)=11.62$ ,  $p=7.38 \times 10^{-11}$ ; STIM:  $t(23)=12.97$ ,  $p=4.59 \times 10^{-12}$ , **Fig. 2A**), demonstrating  
266 that food odors were perceived as rewarding. Importantly, there were no differences in the  
267 pleasantness ratings between groups (main effect of group:  $\chi^2(1)=2.49$ ,  $p=0.115$ ; group by odor  
268 interaction:  $\chi^2(1)=1.34$ ,  $p=0.247$ ). During conditioning, the percentage of trials in which  
269 participants expected a food odor after cue B increased across time relative to cue D (3-way  
270 [group x time x cue] generalized linear mixed model; main effect of cue,  $\chi^2(1)=1736$ ,  $p < 2.2 \times 10^{-16}$ ;  
271 main effect of time,  $\chi^2(2)=0.98$ ,  $p=0.613$ ; cue by time interaction,  $\chi^2(2)=254.22$ ,  $p < 2.2 \times 10^{-16}$ ; **Fig.**  
272 **2B**). There were no significant differences between groups in learning across time (main effect of  
273 group,  $\chi^2(1)=0.096$ ,  $p=0.757$ ; cue by group interaction,  $\chi^2(1)=3.22$ ,  $p=0.072$ ; time by group  
274 interaction,  $\chi^2(2)=2.88$ ,  $p=0.24$ ; cue by time by group interaction,  $\chi^2(2)=0.36$ ,  $p=0.834$ ). Most  
275 importantly, performance in the last conditioning run did not differ between groups ( $t(45)=0.0045$ ,  
276  $p=0.996$ ), demonstrating that subjects in both groups learned the associations between the cues  
277 and their associated outcomes equally well.

278

### 279 ***OFC-targeted cTBS disrupts inference-based responding***

280 After conditioning and immediately prior to the probe test, we applied 40 seconds of cTBS to a  
281 site in right lateral prefrontal cortex (LPFC) that was individually selected to have maximal resting-  
282 state fMRI connectivity with the central/lateral OFC, following previously established procedures  
283 (Howard et al., 2020). Specifically, stimulation was administered in the STIM group at a high  
284 intensity that we have previously shown disrupts OFC network activity and adaptive behavior in  
285 a reinforcer devaluation task. Stimulation in the SHAM group was administered at a low intensity  
286 that was not expected to produce any impact on neural function (Howard et al., 2020).

287 We hypothesized that targeting the lateral OFC network with cTBS would selectively disrupt  
288 reward expectations based on inference but not those based on direct experience. In line with

289 this, we found a significant interaction between cue type and group ( $\chi^2(1)=4.95$ ,  $p=0.026$ ),  
290 indicating that responses to cues A and B were differentially affected by OFC-targeted cTBS  
291 compared to the SHAM group. Indeed, follow-up t-tests showed that this interaction was driven  
292 by significantly reduced responses to cue A in the STIM relative to the SHAM group ( $t(45)=2.40$ ,  
293  $p=0.020$ , **Fig. 3A**) whereas there was no group difference in responding to cue B ( $t(45)=1.18$ ,  
294  $p=0.245$ , **Fig. 3B**). These results were confirmed using permutation tests (group difference in  
295 responding to A,  $p=0.012$ ; group difference in responding to B  $p=0.127$ ). This demonstrates that  
296 effects of OFC-targeted cTBS were specific for inference-based responding.

297 Reward-related responding to cue A depends not only on the ability to make an inference, but  
298 also on knowledge about the reward predicted by cue B, which was acquired through direct  
299 experience (B→reward). To further examine the effects of OFC-targeted cTBS on inference-  
300 based behavior independent of potential effects on direct experience, we normalized responses  
301 to cue A by responses to cue B. The resulting ratio (i.e., A/B) reflects the ability to infer outcomes  
302 relative to the knowledge about directly experienced cue-reward association. This ratio was  
303 significantly smaller in the STIM compared to the SHAM group ( $t(45)=2.33$   $p=0.024$ , **Fig. 3C**). We  
304 confirmed the statistical significance of this difference using a permutation test ( $p=0.013$ ). Taken  
305 together, these results demonstrate that OFC-targeted cTBS selectively impairs behavior based  
306 on inferred outcomes but does not disrupt behavior that can be based on directly experienced  
307 outcomes.

308

### 309 ***OFC-targeted cTBS does not disrupt memory for cue-cue associations***

310 Inference also depends on memory of the cue-cue associations learned during preconditioning  
311 (Wang et al., 2020). It is therefore possible that the findings reported above reflect a failure of  
312 memory rather than inference. Although this is unlikely given that memory of directly experienced  
313 cue-reward associations was unimpaired in the STIM group, we measured recognition memory  
314 for cue-cue associations after the probe test to rule out this potential explanation. In both groups,  
315 recognition memory was significantly above chance (SHAM:  $t(21)=5.01$ ,  $p<0.001$ ; STIM:  
316  $t(20)=2.70$ ,  $p=0.013$ ), and there was no difference between groups ( $t(41)=1.34$ ,  $p=0.188$ ,  
317 permutation test,  $p=0.129$  **Figure 4A**). Moreover, as in our previous study (Wang et al., 2020),  
318 recognition memory was significantly correlated with inference-based responding ( $r=0.51$ ,  
319  $p=0.0005$ , **Figure 4B**). These correlations were significant within each group (SHAM,  $r=0.38$ ,  
320  $p=0.039$ , one-tailed; STIM,  $r=0.55$ ,  $p=0.01$ ) and did not differ between groups ( $Z=-0.93$ ,  $p=0.178$ ).

321 Taken together, these findings demonstrate that similar to directly experienced cue-reward  
322 associations, OFC-targeted cTBS did not significantly impair memory for cue-cue associations,  
323 or how they were used for inference-based behavior.

324

325

## 326 **DISCUSSION**

327 The current study shows that targeting the human OFC with network-based cTBS impairs reward-  
328 related behaviors when outcome expectations need to be mentally simulated, but not when  
329 expectations can be based on direct experience. This closely parallels previous findings from rats  
330 (Jones et al., 2012), providing converging cross-species evidence for a critical role of OFC  
331 networks in model-based but not model-free behavior.

332 As such, our findings suggest that the contribution of OFC to decision making may be limited to  
333 situations that require model-based planning, and that choices based on direct experience may  
334 rely on value computations in other brain areas, such as the amygdala or striatum (Paton et al.,  
335 2006; Cox and Witten, 2019). This proposal is seemingly at odds with a large number of studies  
336 across different species that has shown neural correlates of both inferred and directly experienced  
337 value in OFC (Hare et al., 2009; Schoenbaum et al., 2009; Barron et al., 2013; Stalnaker et al.,  
338 2014; Howard et al., 2015; Padoa-Schioppa and Conen, 2017; Suzuki et al., 2017; Klein-Flugge  
339 et al., 2019; Lopez-Persem et al., 2020; Wang et al., 2020). Why would OFC represent value  
340 signals if they are not required for behavior? One potential answer is that OFC computes and  
341 represents inferred values in all situations, and that these signals may bias choices at any point  
342 (Ballesta et al., 2020). However, if direct experience is available, these signals are typically  
343 indistinguishable from, and redundant with, cached values represented elsewhere in the brain,  
344 such that disruption of OFC does not affect observed behavior. In contrast, because no other  
345 brain area computes model-based values, OFC becomes important for behavior when outcomes  
346 must be inferred. This proposal would explain why animals and humans with compromised OFC  
347 function are capable of making choices, but that these choices reflect previously learned values  
348 even if they are no longer valid (Gallagher et al., 1999; Izquierdo et al., 2004; West et al., 2011;  
349 Rudebeck et al., 2013; Murray et al., 2015; Gardner et al., 2017; Reber et al., 2017; Gardner et  
350 al., 2018; Parkes et al., 2018; Howard et al., 2020).

351 In line with our previous work showing neural correlates of inferred outcomes in OFC (Wang et  
352 al., 2020), the current findings suggest that OFC networks are directly involved in stepping  
353 through the cue-cue and cue-reward associations when inferring outcomes at the time of decision  
354 making. However, alternative explanations have been proposed that do not require inference at  
355 this time point. For instance, cue A could be reactivated at the time of conditioning, such that it  
356 also acquires model-free value, just like cue B. Several studies have provided correlative  
357 evidence for such mediated learning processes in areas of the medial prefrontal cortex and  
358 temporal lobe (Shohamy and Wagner, 2008; Wimmer and Shohamy, 2012; Zeithamova et al.,  
359 2012; Kurth-Nelson et al., 2015). The strongest evidence against such mediated learning comes  
360 from reports that cue A does not support conditioned reinforcement (Sharpe et al., 2017), and  
361 that responding to this cue is sensitive to devaluation (Hart et al., 2020), the gold standards for  
362 assessing model-free and model-based value, respectively. Moreover, pharmacological  
363 inactivation of the OFC in the probe test selectively disrupts responding to cue A without affecting  
364 responding to cue B (Jones et al., 2012). If responding to both A and B were based on the same  
365 neural mechanisms involving model-free values, then presumably the two would not be  
366 differentially affected by OFC inactivation in the final probe test in this earlier experiment or,  
367 indeed, in the current study.

368 However, it is important to keep in mind that behavior can be driven by several independent  
369 mechanisms and that inference-based behavior may occur in parallel with support from additional  
370 mechanisms such as mediated learning (Schlichting and Preston, 2015), which may recruit  
371 hippocampus (Shohamy and Wagner, 2008; Wimmer and Shohamy, 2012; Kurth-Nelson et al.,  
372 2015) and perirhinal cortex (Wong et al., 2019). Nevertheless, the susceptibility of inference-  
373 based responding to OFC-targeted cTBS indicates that at least some amount of behavior in our  
374 task is based on real-time model-based computations. In this regard, it is important to note that  
375 whereas OFC-targeted cTBS reduced subjects' ability to make inference based decisions, it did  
376 not fully abolish this function. This could be related to the fact that we only applied unilateral  
377 stimulation, and thus the contralateral OFC network may have remained unimpaired.  
378 Alternatively, the remaining performance could be driven by mediated learning processes  
379 mentioned above, dependent on areas not impacted by our OFC-targeted manipulation.

380 A limitation of our study is that we did not measure rsfMRI directly after TMS. Therefore, although  
381 stimulation sites were selected to have maximal connectivity with the central-lateral OFC, and we  
382 have previously shown that an identical OFC-targeted protocol disrupts activity in the lateral OFC  
383 network (Howard et al., 2020), we are not able to confirm that this was the case in our current

384 sample. It is therefore possible that local effects of our stimulation on LPFC drove the observed  
385 effects. However, we think this is unlikely for the following reasons. First, our TMS protocol was  
386 identical to our previous study in which we did not observe any effects on LPFC activity (Howard  
387 et al., 2020). Second, our results parallel previous findings with pharmacological inactivation of  
388 OFC in animals (Jones et al., 2012). Third, although medial PFC networks have been implicated  
389 in inference processes (Zeithamova et al., 2012; Schlichting et al., 2015; Schlichting and Preston,  
390 2015), we are not aware of similar findings related to LPFC. However, cTBS could have affected  
391 reliability signals in LPFC that have been shown to correlate with the arbitration of behavioral  
392 control between model-based and model-free processes (Lee et al., 2014).

393 An additional limitation is our sham condition, which involved stimulation at 5% RMT. This is  
394 noticeably different from stimulation at 80% RMT in terms of auditory and somatosensory  
395 stimulation. Thus, these unintended peripheral effects of TMS could have driven the observed  
396 behavioral effects, rather than the neural changes induced by cTBS. We believe this is unlikely  
397 for two reasons. First, effects of cTBS were specific to inference-based behavior, and no  
398 differences were found for behavioral responses based on direct experience or memory for cue-  
399 cue associations. It is difficult to conceive why peripheral effects of the TMS would have highly  
400 disparate effects on two almost identical behaviors that only differ in their requirement for  
401 inference. Second, our previous study utilizing OFC-targeted TMS involved an additional control  
402 condition that was matched for somatosensory stimulation (Howard et al., 2020). Despite  
403 comparable peripheral effects, behavioral and neural effects in this control condition differed  
404 significantly from active cTBS but were similar to the 5% sham condition. We therefore think it is  
405 unlikely that our results were driven by unintended non-neuronal effects of cTBS.

406 In summary, our results support the idea that human OFC networks are necessary for inference-  
407 based behavior, whereas they are not critical to support decision making when direct experience  
408 is available. Deficits in decision making are a hallmark of many neuropsychiatric disorders,  
409 including substance use disorder (SUD) (Volkow and Fowler, 2000; Franklin et al., 2002;  
410 Goldstein et al., 2007; Zilverstand et al., 2018), obsessive compulsive disorder (OCD) (Menzies  
411 et al., 2008; Gillan et al., 2011; Nakao et al., 2014). Our findings may offer a conceptual framework  
412 for understanding how OFC dysfunction may disrupt behavior in these conditions. For instance,  
413 an impaired ability to imagine unobservable states may reinforce checking behaviors in OCD, and  
414 a failure to infer the consequences of long-term drug-use may bias drug-taking decisions in SUD.  
415 It would be important to develop OFC-targeted TMS protocols that enhance rather than disrupt

416 OFC network activity with the goal to develop novel treatments that target specific behavioral  
417 dysfunctions in these disorders.

418

#### 419 **Acknowledgments**

420 The authors thank Rachel Reynolds, Devyn E. Smith, and Kelly Vogel for help with data collection,  
421 and Molly Hermiller for technical support related to TMS. This work was supported by grants from  
422 the National Institute on Deafness and other Communication Disorders (NIDCD, R01DC015426  
423 to T.K.), the National Institute on Drug Abuse (NIDA, R03DA040668 to T.K.), and the Intramural  
424 Research Program at NIDA (ZIA-DA000587 to G.S.). The opinions expressed in this article are  
425 the authors' own and do not reflect the view of the NIH/DHHS. The funders had no role in study  
426 design, data collection and analysis, decision to publish, or preparation of the manuscript.

427

#### 428 **Author Contributions**

429 F.W., G.S., J.L.V, and T.K. designed the experiment. F.W. and J.D.H. collected the data. F.W.  
430 analyzed the data. F.W., G.S. and T.K. interpreted the results and wrote the manuscript.

431

432 **FIGURE LEGENDS**

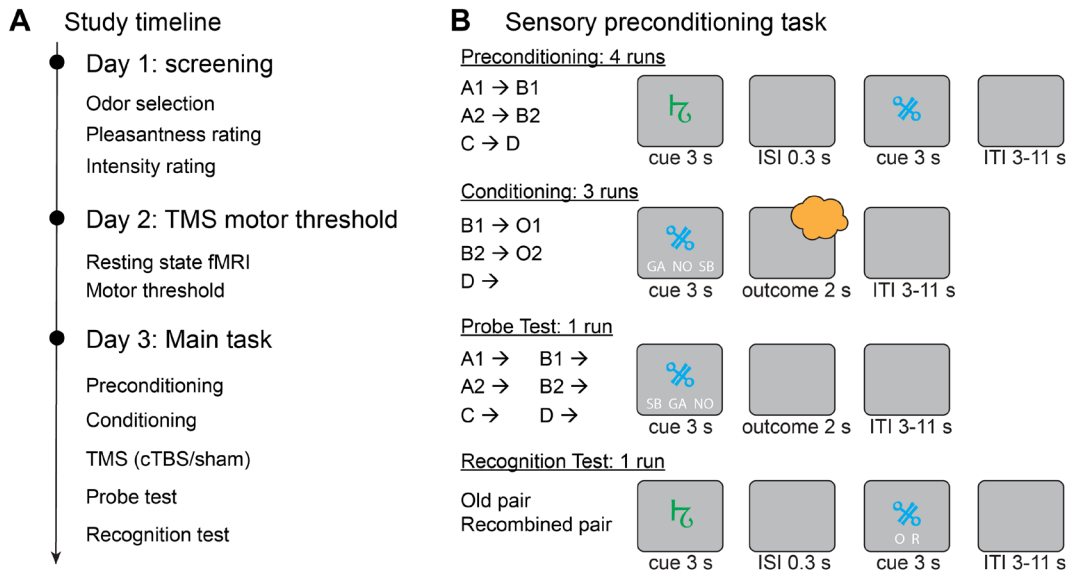

433

434 **Figure 1. Experimental design and sensory preconditioning task. A.** Experimental timeline.

435 **B.** Participants learned cue pairs during preconditioning (A→B, C→D). During conditioning, they

436 learned associations between the second cue in each pair and one of two food odors (O1 or O2)

437 or odorless air (B → odor reward, D → odorless air). During the probe test, participants were

438 asked to make outcome predictions to all cues, but no outcomes were delivered. Finally, subjects

439 completed a recognition task testing for memory of cue-cue associations.

440

441



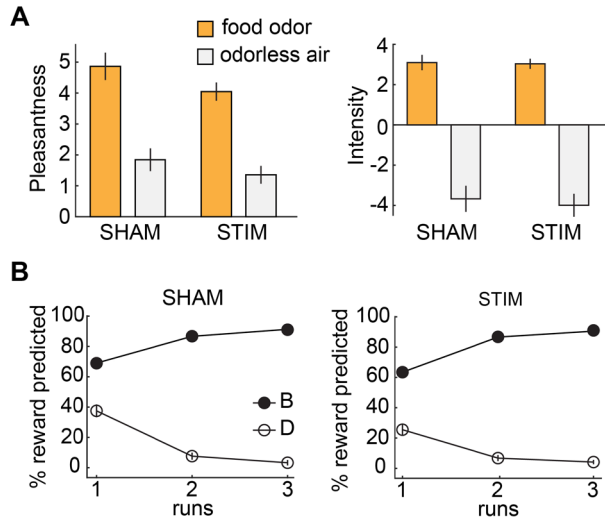

442

443 **Figure 2. Odor ratings and behavioral performance during conditioning.** **A.** Participants  
444 rated the pleasantness (left) and intensity (right) of food odors significantly higher than odorless  
445 air ( $p < 0.001$ ), but ratings did not differ between groups ( $p$ 's  $> 0.14$ ). **B.** The percentage of trials in  
446 which an odor reward was expected after cue B increased relative to cue D across time during  
447 conditioning, and there were no group differences. Error bars depict SEM ( $n = 23$  SHAM,  $n = 24$   
448 STIM).

449

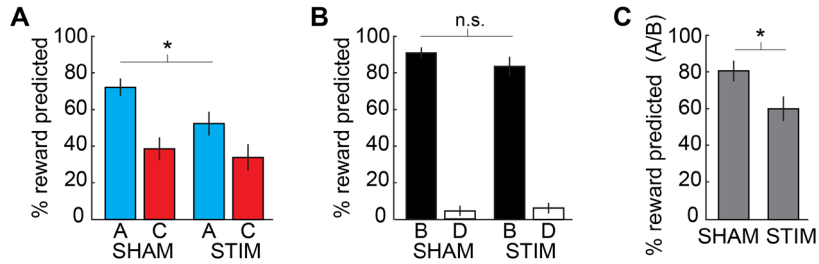

450

451 **Figure 3. Responses based on inferred outcomes are disrupted by OFC-targeted cTBS. A.**

452 The percentage of trials in which participants predicted a reward for cue A was significantly larger

453 in the SHAM compared to the STIM group ( $p=0.020$ ). There was no difference in reward

454 predictions for cue C ( $p=0.642$ ). **B.** There was no group difference in responding to cue B

455 ( $p=0.245$ ) or D ( $p=0.740$ ). **C.** Responses to cue A relative to cue B (A/B) were significantly

456 stronger in the SHAM compared to the STIM group ( $p=0.024$ ). Error bars depict SEM (n=23 SHAM,

457 n=24 STIM) and \* depicts  $p<0.05$ .

458

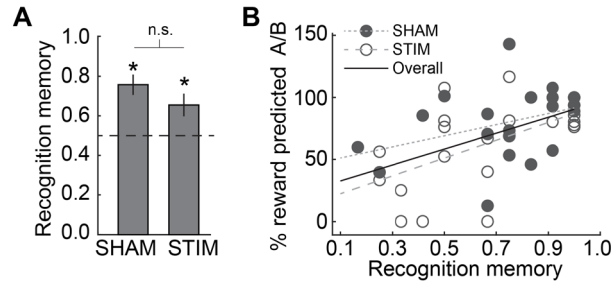

459

460 **Figure 4. Memory for cue-cue associations and its relation to inference-based behavior is**  
461 **not altered by OFC-targeted cTBS. A.** Recognition memory for cue-cue pairs does not differ  
462 between groups ( $p=0.188$ ). \* depicts  $p<0.05$ . **B.** Recognition memory for cue-cue associations  
463 was significantly correlated with responding to preconditioned cues (reward prediction responses  
464 to A/B) during the probe test ( $r=0.51$ ,  $p<0.001$ , solid circles: SHAM; empty circles: STIM), and this  
465 correlation did not differ between groups ( $Z=-0.93$ ,  $p=0.178$ ).

466 **REFERENCES**

- 467 Balleine BW, Dickinson A (1998) Goal-directed instrumental action: contingency and incentive  
468 learning and their cortical substrates. *Neuropharmacology* 37:407-419.
- 469 Ballesta S, Shi W, Conen KE, Padoa-Schioppa C (2020) Values Encoded in Orbitofrontal  
470 Cortex Are Causally Related to Economic Choices. *bioRxiv:2020.2003.2010.984021*.
- 471 Barron HC, Dolan RJ, Behrens TE (2013) Online evaluation of novel choices by simultaneous  
472 representation of multiple memories. *Nat Neurosci* 16:1492-1498.
- 473 Bates D (2010) lme4 : linear mixed-effects models using Eigen and S4 classes. R package version  
474 0.999375-33. <http://CRAN.R-project.org/package=lme4>.
- 475 Cox J, Witten IB (2019) Striatal circuits for reward learning and decision-making. *Nat Rev*  
476 *Neurosci* 20:482-494.
- 477 Daw ND, Niv Y, Dayan P (2005) Uncertainty-based competition between prefrontal and  
478 dorsolateral striatal systems for behavioral control. *Nat Neurosci* 8:1704-1711.
- 479 Daw ND, Gershman SJ, Seymour B, Dayan P, Dolan RJ (2011) Model-based influences on  
480 humans' choices and striatal prediction errors. *Neuron* 69:1204-1215.
- 481 Franklin TR, Acton PD, Maldjian JA, Gray JD, Croft JR, Dackis CA, O'Brien CP, Childress AR  
482 (2002) Decreased gray matter concentration in the insular, orbitofrontal, cingulate, and  
483 temporal cortices of cocaine patients. *Biol Psychiatry* 51:134-142.
- 484 Gallagher M, McMahan RW, Schoenbaum G (1999) Orbitofrontal cortex and representation of  
485 incentive value in associative learning. *J Neurosci* 19:6610-6614.
- 486 Gardner MP, Conroy JC, Styer CV, Huynh T, Whitaker LR, Schoenbaum G (2018) Medial  
487 orbitofrontal inactivation does not affect economic choice. *Elife* 7.
- 488 Gardner MPH, Conroy JS, Shaham MH, Styer CV, Schoenbaum G (2017) Lateral Orbitofrontal  
489 Inactivation Dissociates Devaluation-Sensitive Behavior and Economic Choice. *Neuron*  
490 96:1192-1203 e1194.
- 491 Gillan CM, Pappmeyer M, Morein-Zamir S, Sahakian BJ, Fineberg NA, Robbins TW, de Wit S  
492 (2011) Disruption in the balance between goal-directed behavior and habit learning in  
493 obsessive-compulsive disorder. *Am J Psychiatry* 168:718-726.
- 494 Goldstein RZ, Tomasi D, Rajaram S, Cottone LA, Zhang L, Maloney T, Telang F, Alia-Klein N,  
495 Volkow ND (2007) Role of the anterior cingulate and medial orbitofrontal cortex in  
496 processing drug cues in cocaine addiction. *Neuroscience* 144:1153-1159.
- 497 Hare TA, Camerer CF, Rangel A (2009) Self-control in decision-making involves modulation of  
498 the vmPFC valuation system. *Science* 324:646-648.
- 499 Hart EE, Sharpe MJ, Gardner MP, Schoenbaum G (2020) Devaluation-sensitive responding to  
500 preconditioned cues requires orbitofrontal cortex during initial cue-cue learning.  
501 *bioRxiv:2020.2006.2015.152991*.
- 502 Howard JD, Kahnt T (2017) Identity-Specific Reward Representations in Orbitofrontal Cortex  
503 Are Modulated by Selective Devaluation. *J Neurosci* 37:2627-2638.
- 504 Howard JD, Kahnt T (2018) Identity prediction errors in the human midbrain update reward-  
505 identity expectations in the orbitofrontal cortex. *Nat Commun* 9:1611.
- 506 Howard JD, Gottfried JA, Tobler PN, Kahnt T (2015) Identity-specific coding of future rewards in  
507 the human orbitofrontal cortex. *Proc Natl Acad Sci U S A* 112:5195-5200.

- 508 Howard JD, Reynolds R, Smith DE, Voss JL, Schoenbaum G, Kahnt T (2020) Targeted  
509 Stimulation of Human Orbitofrontal Networks Disrupts Outcome-Guided Behavior.  
510 *Current biology* : CB 30:490-498 e494.
- 511 Huang YZ, Edwards MJ, Rounis E, Bhatia KP, Rothwell JC (2005) Theta burst stimulation of the  
512 human motor cortex. *Neuron* 45:201-206.
- 513 Izquierdo A, Suda RK, Murray EA (2004) Bilateral orbital prefrontal cortex lesions in rhesus  
514 monkeys disrupt choices guided by both reward value and reward contingency. *J*  
515 *Neurosci* 24:7540-7548.
- 516 Jones JL, Esber GR, McDannald MA, Gruber AJ, Hernandez A, Mirenski A, Schoenbaum G  
517 (2012) Orbitofrontal cortex supports behavior and learning using inferred but not cached  
518 values. *Science* 338:953-956.
- 519 Kahnt T, Chang LJ, Park SQ, Heinzle J, Haynes JD (2012) Connectivity-based parcellation of  
520 the human orbitofrontal cortex. *J Neurosci* 32:6240-6250.
- 521 Klein-Flugge MC, Wittmann MK, Shpektor A, Jensen DEA, Rushworth MFS (2019) Multiple  
522 associative structures created by reinforcement and incidental statistical learning  
523 mechanisms. *Nat Commun* 10:4835.
- 524 Kurth-Nelson Z, Barnes G, Sejdinovic D, Dolan R, Dayan P (2015) Temporal structure in  
525 associative retrieval. *Elife* 4.
- 526 Lee SW, Shimojo S, O'Doherty JP (2014) Neural computations underlying arbitration between  
527 model-based and model-free learning. *Neuron* 81:687-699.
- 528 Lopez-Persem A, Bastin J, Petton M, Abitbol R, Lehongre K, Adam C, Navarro V, Rheims S,  
529 Kahane P, Domenech P, Pessiglione M (2020) Four core properties of the human brain  
530 valuation system demonstrated in intracranial signals. *Nat Neurosci*.
- 531 Menzies L, Chamberlain SR, Laird AR, Thelen SM, Sahakian BJ, Bullmore ET (2008)  
532 Integrating evidence from neuroimaging and neuropsychological studies of obsessive-  
533 compulsive disorder: the orbitofronto-striatal model revisited. *Neurosci Biobehav Rev*  
534 32:525-549.
- 535 Murray EA, Moylan EJ, Saleem KS, Basile BM, Turchi J (2015) Specialized areas for value  
536 updating and goal selection in the primate orbitofrontal cortex. *Elife* 4.
- 537 Nakao T, Okada K, Kanba S (2014) Neurobiological model of obsessive-compulsive disorder:  
538 evidence from recent neuropsychological and neuroimaging findings. *Psychiatry Clin*  
539 *Neurosci* 68:587-605.
- 540 O'Doherty JP, Cockburn J, Pauli WM (2017) Learning, Reward, and Decision Making. *Annual*  
541 *review of psychology* 68:73-100.
- 542 Padoa-Schioppa C, Conen KE (2017) Orbitofrontal Cortex: A Neural Circuit for Economic  
543 Decisions. *Neuron* 96:736-754.
- 544 Parkes SL, Ravassard PM, Cerpa JC, Wolff M, Ferreira G, Coutureau E (2018) Insular and  
545 Ventrolateral Orbitofrontal Cortices Differentially Contribute to Goal-Directed Behavior in  
546 Rodents. *Cereb Cortex* 28:2313-2325.
- 547 Paton JJ, Belova MA, Morrison SE, Salzman CD (2006) The primate amygdala represents the  
548 positive and negative value of visual stimuli during learning. *Nature* 439:865-870.
- 549 R Core Team (2018) R: A language and environment for statistical computing. In: R Foundation  
550 for Statistical Computing, Vienna, Austria. Available online at <https://www.R-project.org/>.

- 551 Reber J, Feinstein JS, O'Doherty JP, Liljeholm M, Adolphs R, Tranel D (2017) Selective  
552 impairment of goal-directed decision-making following lesions to the human  
553 ventromedial prefrontal cortex. *Brain* 140:1743-1756.
- 554 Rudebeck PH, Murray EA (2014) The orbitofrontal oracle: cortical mechanisms for the prediction  
555 and evaluation of specific behavioral outcomes. *Neuron* 84:1143-1156.
- 556 Rudebeck PH, Saunders RC, Prescott AT, Chau LS, Murray EA (2013) Prefrontal mechanisms  
557 of behavioral flexibility, emotion regulation and value updating. *Nat Neurosci* 16:1140-  
558 1145.
- 559 Sadacca BF, Wied HM, Lopatina N, Saini GK, Nemirovsky D, Schoenbaum G (2018)  
560 Orbitofrontal neurons signal sensory associations underlying model-based inference in a  
561 sensory preconditioning task. *Elife* 7.
- 562 Schlichting ML, Preston AR (2015) Memory integration: neural mechanisms and implications for  
563 behavior. *Current opinion in behavioral sciences* 1:1-8.
- 564 Schlichting ML, Mumford JA, Preston AR (2015) Learning-related representational changes  
565 reveal dissociable integration and separation signatures in the hippocampus and  
566 prefrontal cortex. *Nat Commun* 6:8151.
- 567 Schoenbaum G, Roesch MR, Stalnaker TA, Takahashi YK (2009) A new perspective on the role  
568 of the orbitofrontal cortex in adaptive behaviour. *Nat Rev Neurosci* 10:885-892.
- 569 Schultz W (1998) Predictive reward signal of dopamine neurons. *Journal of Neurophysiology*  
570 80:1-27.
- 571 Sharpe MJ, Batchelor HM, Schoenbaum G (2017) Preconditioned cues have no value. *Elife* 6.
- 572 Shohamy D, Wagner AD (2008) Integrating memories in the human brain: hippocampal-  
573 midbrain encoding of overlapping events. *Neuron* 60:378-389.
- 574 Stalnaker TA, Cooch NK, McDannald MA, Liu TL, Wied H, Schoenbaum G (2014) Orbitofrontal  
575 neurons infer the value and identity of predicted outcomes. *Nat Commun* 5:3926.
- 576 Suarez JA, Howard JD, Schoenbaum G, Kahnt T (2019) Sensory prediction errors in the human  
577 midbrain signal identity violations independent of perceptual distance. *Elife* 8.
- 578 Suzuki S, Cross L, O'Doherty JP (2017) Elucidating the underlying components of food  
579 valuation in the human orbitofrontal cortex. *Nat Neurosci* 20:1780-1786.
- 580 Takahashi YK, Chang CY, Lucantonio F, Haney RZ, Berg BA, Yau HJ, Bonci A, Schoenbaum G  
581 (2013) Neural estimates of imagined outcomes in the orbitofrontal cortex drive behavior  
582 and learning. *Neuron* 80:507-518.
- 583 Tricomi E, Balleine BW, O'Doherty JP (2009) A specific role for posterior dorsolateral striatum in  
584 human habit learning. *Eur J Neurosci* 29:2225-2232.
- 585 Vaidya AR, Pujara MS, Petrides M, Murray EA, Fellows LK (2019) Lesion Studies in  
586 Contemporary Neuroscience. *Trends Cogn Sci* 23:653-671.
- 587 Volkow ND, Fowler JS (2000) Addiction, a disease of compulsion and drive: involvement of the  
588 orbitofrontal cortex. *Cereb Cortex* 10:318-325.
- 589 Wang F, Schoenbaum G, Kahnt T (2020) Interactions between human orbitofrontal cortex and  
590 hippocampus support model-based inference. *PLoS Biol* 18:e3000578.

- 591 Wang JX, Rogers LM, Gross EZ, Ryals AJ, Dokucu ME, Brandstatt KL, Hermiller MS, Voss JL  
592 (2014) Targeted enhancement of cortical-hippocampal brain networks and associative  
593 memory. *Science* 345:1054-1057.
- 594 West EA, DesJardin JT, Gale K, Malkova L (2011) Transient inactivation of orbitofrontal cortex  
595 blocks reinforcer devaluation in macaques. *J Neurosci* 31:15128-15135.
- 596 Wikenheiser AM, Schoenbaum G (2016) Over the river, through the woods: cognitive maps in  
597 the hippocampus and orbitofrontal cortex. *Nat Rev Neurosci* 17:513-523.
- 598 Wimmer GE, Shohamy D (2012) Preference by association: how memory mechanisms in the  
599 hippocampus bias decisions. *Science* 338:270-273.
- 600 Wong FS, Westbrook RF, Holmes NM (2019) 'Online' integration of sensory and fear memories  
601 in the rat medial temporal lobe. *Elife* 8.
- 602 Wunderlich K, Dayan P, Dolan RJ (2012) Mapping value based planning and extensively trained  
603 choice in the human brain. *Nat Neurosci* 15:786-791.
- 604 Zald DH, McHugo M, Ray KL, Glahn DC, Eickhoff SB, Laird AR (2014) Meta-analytic  
605 connectivity modeling reveals differential functional connectivity of the medial and lateral  
606 orbitofrontal cortex. *Cereb Cortex* 24:232-248.
- 607 Zeithamova D, Dominick AL, Preston AR (2012) Hippocampal and ventral medial prefrontal  
608 activation during retrieval-mediated learning supports novel inference. *Neuron* 75:168-  
609 179.
- 610 Zilverstand A, Huang AS, Alia-Klein N, Goldstein RZ (2018) Neuroimaging Impaired Response  
611 Inhibition and Salience Attribution in Human Drug Addiction: A Systematic Review.  
612 *Neuron* 98:886-903.
- 613
